# Supplementary material for: Gold Nanoclusters Display Low Immunogenic Effect in Microglia Cells
Source: MDPI journal article supplement (doi:10.3390/nano11051066), 2021-04-21
Supplement: s1 [file s1]

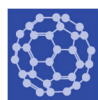

## Article

# Gold Nanoclusters Display Low Immunogenic Effect in Microglia Cells

Joanna Sobska <sup>1,2,3,4,5</sup>, Magdalena Waszkielewicz <sup>6</sup>, Anna Podleśny-Drabiniok <sup>2,3,4,5</sup>, Joanna Olesiak-Banska <sup>1</sup>, Wojciech Krężel <sup>2,3,4,5,\*</sup> and Katarzyna Matczyszyn <sup>1,\*</sup>

<sup>1</sup> Advanced Materials Engineering and Modelling Group, Wrocław University of Science and Technology, Wybrzeże Wyspiańskiego 27, 50-370 Wrocław, Poland; joanna.sobska@pwr.edu.pl (J.S.); joanna.olesiak-banska@pwr.edu.pl (J.O.-B.)

<sup>2</sup> Institut de Génétique et de Biologie Moléculaire et Cellulaire, Department of Development and Stem Cells, 1 Rue Laurent Fries, 67404 Illkirch, France; podlesny@igbmc.fr

<sup>3</sup> Institut de la Santé et de la Recherche Médicale, U 1258, 67404 Illkirch, France

<sup>4</sup> Centre National de la Recherche Scientifique, UMR 7104, 67404 Illkirch, France

<sup>5</sup> Université de Strasbourg, 67404 Illkirch, France

<sup>6</sup> Polish Center for Technology Development - Port Lukasiewicz, Stabłowicka 147, 54-066 Wrocław, Poland; magdalena.waszkielewicz@port.lukasiewicz.gov.pl

\* Correspondence: krezel@igbmc.fr (W.K.); katarzyna.matczyszyn@pwr.edu.pl (K.M.)

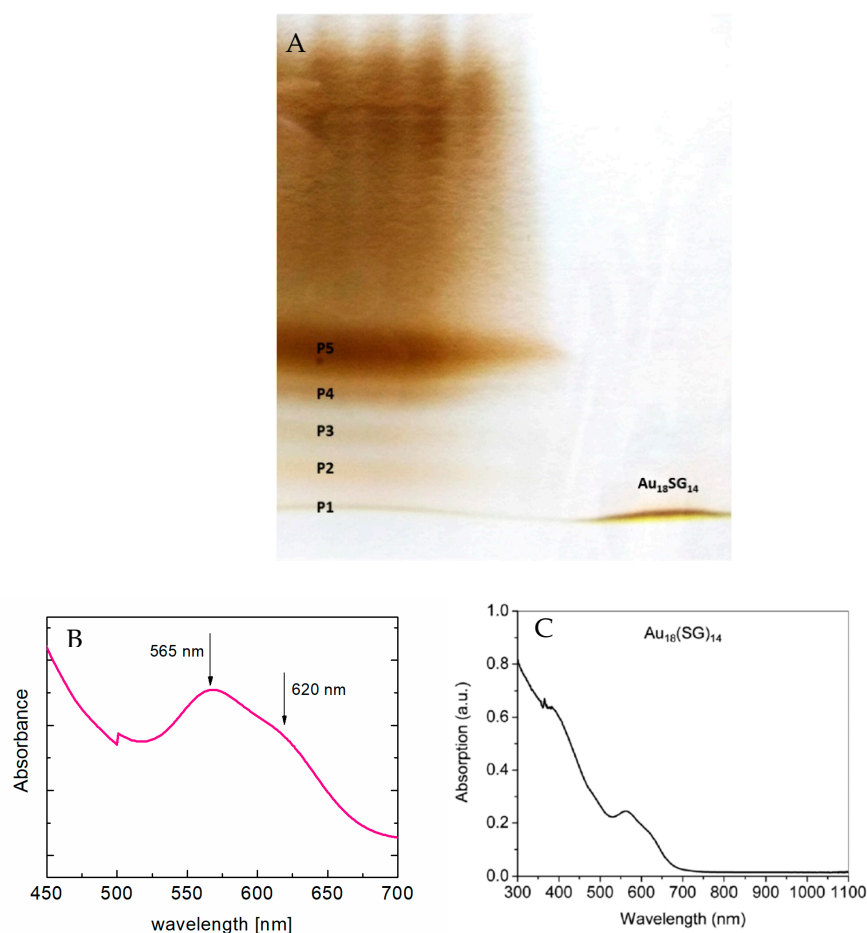

**Figure S1.** (A) PAGE electrophoresis of AuSG nanoclusters of various sizes, synthesized with a protocol [1] and AuSG synthesized with a protocol [2], identified as  $Au_{18}(SG)_{14}$ . (B) Absorption spectrum of Au18 nanoclusters, (C) absorption spectrum of  $Au_{18}(SG)_{14}$  from publication [3]. Comparison of PAGE with [1] and comparison of the spectrum B with [3] and references therein, allows to assign nanocluster sizes in fraction P1 as a mixture of Au10–Au18 and the second sample as  $Au_{18}SG_{14}$ .

## References

1. Negishi, Y.; Nobusada, K.; Tsukuda, T. Glutathione-protected gold clusters revisited: Bridging the gap between gold(I)-thiolate complexes and thiolate-protected gold nanocrystals. *J. Am. Chem. Soc.* **2005**, *127*, 5261–5270, doi:10.1021/ja042218h.
2. Ghosh, A.; Udayabhaskararao, T.; Pradeep, T. One-step route to luminescent Au 18SG 14 in the condensed phase and its closed shell molecular ions in the gas phase. *J. Phys. Chem. Lett.* **2012**, *3*, 1997–2002, 2012, doi:10.1021/jz3007436.
3. Jin, R. Atomically precise metal nanoclusters: Stable sizes and optical properties. *Nanoscale* **2015**, *7*, doi:1549–1565, 2015, doi:10.1039/c4nr05794e.
